# Supplementary material for: Meta-analysis of the radiological and clinical features of Usual Interstitial Pneumonia (UIP) and Nonspecific Interstitial Pneumonia (NSIP)
Source: PLoS One. 2020 Jan 13;15(1):e0226084. doi: 10.1371/journal.pone.0226084 (PMC6957301; doi:10.1371/journal.pone.0226084)
Supplement: S3 File — (DOCX) [file pone.0226084.s003.docx]

| | **S 3:** Comparison of the DerSimonian & Laird and Paule-Mandel approach.   |  | n studies | DerSimonian-Laird | 95%-CI | p-value | I-squared | 95%-CI | Paule-Mandel | 95%-CI | p-value | I-squared | | --- | --- | --- | --- | --- | --- | --- | --- | --- | --- | --- | |  |  | Pooled OR |  |  |  |  | Pooled OR |  |  |  | | male | 6 | 0.32 | (0.17 to 0.60) | <0.001 | 48.8 % | (0.0 to 79.7) | 0.32 | (0.17 to 0.60) | <0.001 | 48.2 % | | Smoking (ever and past-smokers) | 4 | 0.42 | (0.23 to 0.76) | 0.005 | 35.4 % | (0.0 to 77.5) | 0.42 | (0.23 to 0.76) | 0.005 | 34.8 % | | GGO (y/n) | 3 § | 32.05 | (0.08 to 12654.94) | 0.256 | 92.4 % | ** | 31.42 | (0.12 to 8144.19) | 0.224 | 91.3 % | | Honeycombing (y/n) | 4 | 0.07 | (0.02 to 0.30) | <0.001 | 66.9 % | (0.0 to 88.2) | 0.07 | (0.02 to 0.33) | 0.001 | 71.8 % | | Consolidation y/n | 3 | 14.34 | (0.59 to 346.96) | 0.101 | 78.5 % | (16.5 to 92.4) | 14.22 | (0.68 to 295.75) | 0.086 | 76.3 % | | Reticulation (y/n) | 2 § | 0.12* | (0.01 to 1.10) | 0.060 | n.a. | ** | n.a. | n.a. | n.a. | n.a. | | predominant GGO: GGO>(R+H) | 2 | 3.68 | (1.22 to 11.09) | 0.021 | 0.0 % | ** | n.a. | n.a. | n.a. | n.a. | | predominant reticulation: (R+H)>GGO | 2 | 0.15 | (0.03 to 0.68) | 0.014 | 67.3 % | ** | n.a. | n.a. | n.a. | n.a. | | H: H and/or R > G | 2 | 0.06 | (0.01 to 0.32) | 0.001 | 0.0 % | ** | n.a. | n.a. | n.a. | n.a. | | Relative subpleural spearing (y/n) | 3 | 16.33 | (2.29 to 116.56) | 0.005 | 67.4 % | (0.0 to 89.3) | 14.64 | (2.79 to 76.89) | 0.002 | 55.2 % | | peripheral predominance (outer 1/3) | 6 | 0.21 | (0.11 to 0.39) | <0.001 | 16.2 % | (0.0 to 78.7) | 0.21 | (0.11 to 0.39) | <0.001 | 18.6 % | | central predominance/perbronchial (inner 2/3) | 5 | 6.19 | (2.43 to 15.75) | <0.001 | 34.3 % | (0.0 to 75.2) | 6.18 | (2.11 to 18.10) | 0.001 | 48.3 % | | both inner outer | 5 | 2.34 | (1.07 to 5.11) | 0.033 | 0.0 % | (0.0 to 79.2) | 2.34 | (1.07 to 5.11) | 0.033 | 0.0 % | | upper predominant distribution | 3 § | 0.53 | (0.05 to 5.34) | 0.592 | 0.0 % | ** | 0.53 | (0.05 to 5.34) | 0.592 | 0.0 % | | lower (below carina/) | 4 | 0.96 | (0.28 to 3.36) | 0.955 | 6.1 % | (0.0 to 85.6) | 0.96 | (0.28 to 3.36) | 0.955 | 6.0 % | | both upper lower | 3 | 0.91 | (0.23 to 3.63) | 0.892 | 0.0 % | (0.0 to 89.6) | 0.91 | (0.23 to 3.63) | 0.892 | 0.0 % | |  |  | Pooled MD |  |  |  |  | Pooled MD |  |  |  | | Age mean estimation | 6 | -4.37 | (-6.98 to -1.77) | 0.001 | 30.9 % | (0.0 to 73.5) | -4.39 | (-7.06 to -1.73) | 0.001 | 33.9 % | | TOT disease extent (mean % of Lung volume) | 6 | -2.11 | (-4.59 to 0.37) | 0.095 | 0.0 % | (0.0 to 84.7) | -2.11 | (-4.59 to 0.37) | 0.095 | 0.0 % | | GGO extent (mean % of Lung volume) | 7 | 3.03 | (1.31 to 4.75) | 0.001 | 31.3 % | (0.0 to 73.7) | 3.12 | (0.87 to 5.37) | 0.006 | 55.7 % | | Honeycombing extent (mean % of Lung volume) | 6 | -3.86 | (-6.65 to -1.06) | 0.007 | 90.4 % | (78.6 to 95.7) | -5.58 | (-12.39 to 1.23) | 0.109 | 98.5 % | | Consolidation extent (mean % of Lung volume) | 7 | 1.79 | (0.62 to 2.96) | 0.003 | 58.9 % | (0.0 to 84.7) | 2.10 | (0.19 to 4.01) | 0.031 | 84.5 % | | Reticulation extent (mean % of Lung volume) | 2 | -0.28 | (-2.13 to 1.56) | 0.763 | 0.0 % | ** | n.a. | n.a. | n.a. | n.a. | | Emphysema extent (mean % of Lung volume) | 2 | -1.40 | (-4.97 to 2.16) | 0.440 | 71.5 % | ** | n.a. | n.a. | n.a. | n.a. | | | --- | --- | --- | --- | --- | --- | --- | --- | --- | --- | --- | --- | --- | --- | --- | --- | --- | --- | --- | --- | --- | --- | --- | --- | --- | --- | --- | --- | --- | --- | --- | --- | --- | --- | --- | --- | --- | --- | --- | --- | --- | --- | --- | --- | --- | --- | --- | --- | --- | --- | --- | --- | --- | --- | --- | --- | --- | --- | --- | --- | --- | --- | --- | --- | --- | --- | --- | --- | --- | --- | --- | --- | --- | --- | --- | --- | --- | --- | --- | --- | --- | --- | --- | --- | --- | --- | --- | --- | --- | --- | --- | --- | --- | --- | --- | --- | --- | --- | --- | --- | --- | --- | --- | --- | --- | --- | --- | --- | --- | --- | --- | --- | --- | --- | --- | --- | --- | --- | --- | --- | --- | --- | --- | --- | --- | --- | --- | --- | --- | --- | --- | --- | --- | --- | --- | --- | --- | --- | --- | --- | --- | --- | --- | --- | --- | --- | --- | --- | --- | --- | --- | --- | --- | --- | --- | --- | --- | --- | --- | --- | --- | --- | --- | --- | --- | --- | --- | --- | --- | --- | --- | --- | --- | --- | --- | --- | --- | --- | --- | --- | --- | --- | --- | --- | --- | --- | --- | --- | --- | --- | --- | --- | --- | --- | --- | --- | --- | --- | --- | --- | --- | --- | --- | --- | --- | --- | --- | --- | --- | --- | --- | --- | --- | --- | --- | --- | --- | --- | --- | --- | --- | --- | --- | --- | --- | --- | --- | --- | --- | --- | --- | --- | --- | --- | --- | --- | --- | --- | --- | --- | --- | --- | --- | --- | --- | --- | --- | --- | --- | --- | --- | --- | --- | --- | --- | --- | --- | --- | --- | --- | --- | --- | --- | --- | --- | --- | --- | --- | --- | --- | --- | --- | --- | --- | --- | --- | --- | --- | --- | --- | --- | --- | --- | --- | --- | --- | --- | |
| --- | --- | --- | --- | --- | --- | --- | --- | --- | --- | --- | --- | --- | --- | --- | --- | --- | --- | --- | --- | --- | --- | --- | --- | --- | --- | --- | --- | --- | --- | --- | --- | --- | --- | --- | --- | --- | --- | --- | --- | --- | --- | --- | --- | --- | --- | --- | --- | --- | --- | --- | --- | --- | --- | --- | --- | --- | --- | --- | --- | --- | --- | --- | --- | --- | --- | --- | --- | --- | --- | --- | --- | --- | --- | --- | --- | --- | --- | --- | --- | --- | --- | --- | --- | --- | --- | --- | --- | --- | --- | --- | --- | --- | --- | --- | --- | --- | --- | --- | --- | --- | --- | --- | --- | --- | --- | --- | --- | --- | --- | --- | --- | --- | --- | --- | --- | --- | --- | --- | --- | --- | --- | --- | --- | --- | --- | --- | --- | --- | --- | --- | --- | --- | --- | --- | --- | --- | --- | --- | --- | --- | --- | --- | --- | --- | --- | --- | --- | --- | --- | --- | --- | --- | --- | --- | --- | --- | --- | --- | --- | --- | --- | --- | --- | --- | --- | --- | --- | --- | --- | --- | --- | --- | --- | --- | --- | --- | --- | --- | --- | --- | --- | --- | --- | --- | --- | --- | --- | --- | --- | --- | --- | --- | --- | --- | --- | --- | --- | --- | --- | --- | --- | --- | --- | --- | --- | --- | --- | --- | --- | --- | --- | --- | --- | --- | --- | --- | --- | --- | --- | --- | --- | --- | --- | --- | --- | --- | --- | --- | --- | --- | --- | --- | --- | --- | --- | --- | --- | --- | --- | --- | --- | --- | --- | --- | --- | --- | --- | --- | --- | --- | --- | --- | --- | --- | --- | --- | --- | --- | --- | --- | --- | --- | --- | --- | --- | --- | --- | --- | --- | --- | --- | --- | --- | --- | --- | --- | --- | --- | --- | --- | --- | --- | --- | --- | --- | --- | --- |
